# Supplementary material for: Capsaicin-enriched diet ameliorates autoimmune neuritis in rats
Source: PubMed Central journal article supplement (PMC5916583; doi:10.1186/s12974-018-1165-x), 2018-04-24

**A**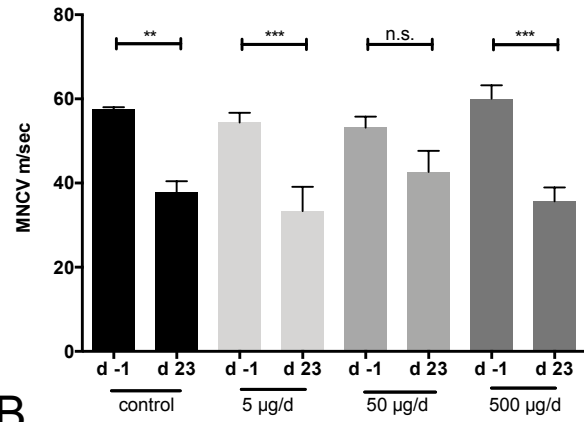**B**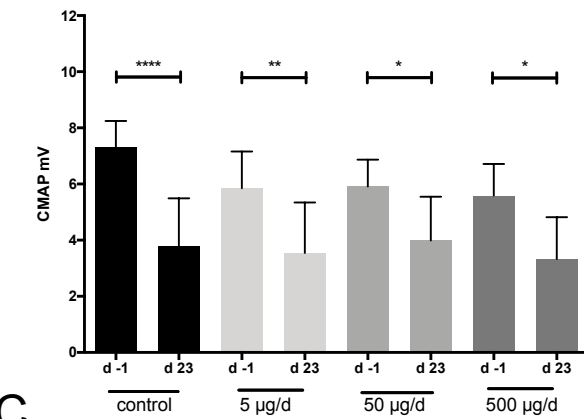**C**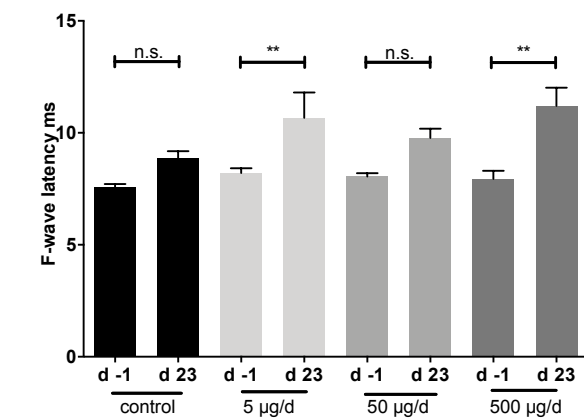**D**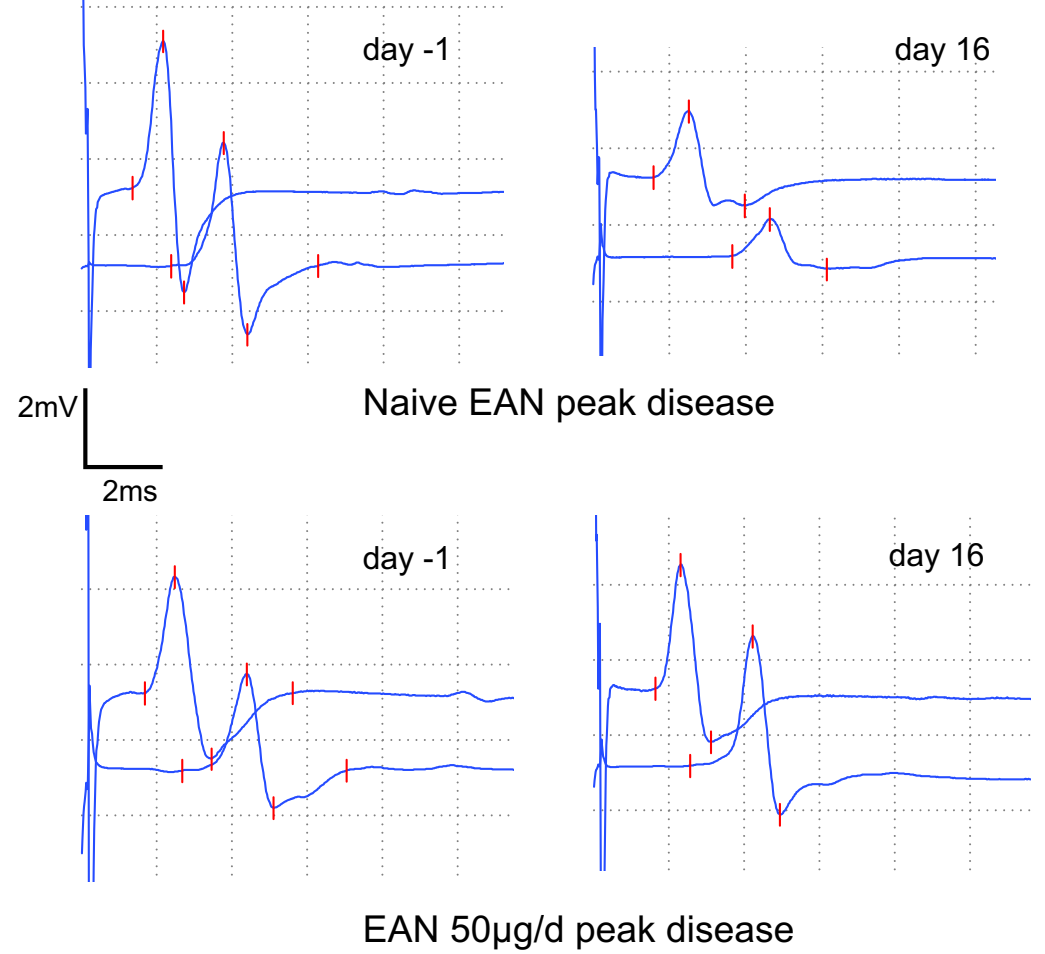

Supplement: 12974_2018_1165_MOESM2_ESM.pdf [file 12974_2018_1165_MOESM2_ESM.pdf]
